# Supplementary material
Source: ML conference proceedings conference paper supplement (https://openaccess.thecvf.com/content/ICCV_2019/html/Cui_Fast_and_Practical_ICCV_2019_paper.html)
Supplement: Supplementary file 1 [file Cui_Fast_and_Practical_ICCV_2019_supplemental.pdf]

# Fast and Practical Neural Architecture Search (Supplementary Material)

Jiequan Cui<sup>1</sup> \* Pengguang Chen<sup>1</sup> \* Ruiyu Li<sup>2</sup> Shu Liu<sup>2</sup> Xiaoyong Shen<sup>2</sup> Jiaya Jia<sup>1,2</sup>  
<sup>1</sup>The Chinese University of Hong Kong <sup>2</sup>YouTu Lab, Tencent  
{jqcui, pgchen, leojia}@cse.cuhk.edu.hk, {royryli, shawnshuliu, dylanshen}@tencent.com

## 1. Ablation Study

We explore effect of using different optimization orders. Table 1 shows the comparison, which implies that search in the inverted order achieves the best performance.

| Optimization Order | Top-1 (%) |
|--------------------|-----------|
| Random order 1     | 95.73     |
| Random order 2     | 95.73     |
| Positive order     | 95.77     |
| Inverted order     | 96.01     |

Table 1. FPNAS results using different optimization orders.

## 2. Segmentation Results

Fig. 1 shows the segmentation results of our re-implemented ShuffleNet V2 and our FPNASNet on ADE20K dataset.

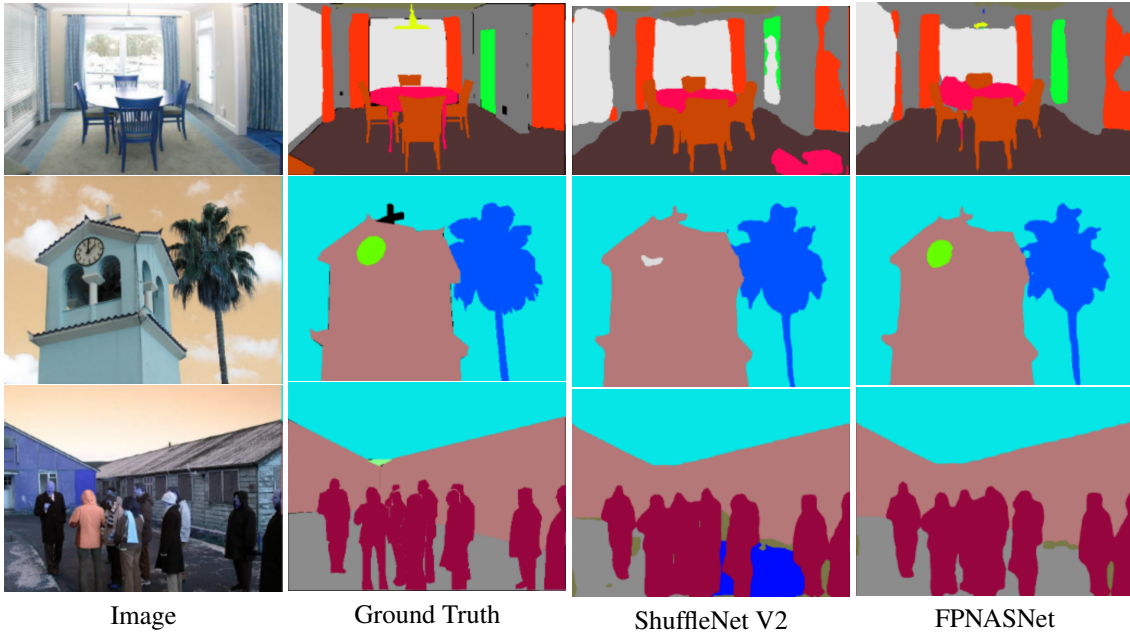

Figure 1. Results of semantic segmentation on ADE20K dataset.

---

\*Equal contribution

### 3. Network Architecture

Figs. 2, 3, and 4 show details of our networks.

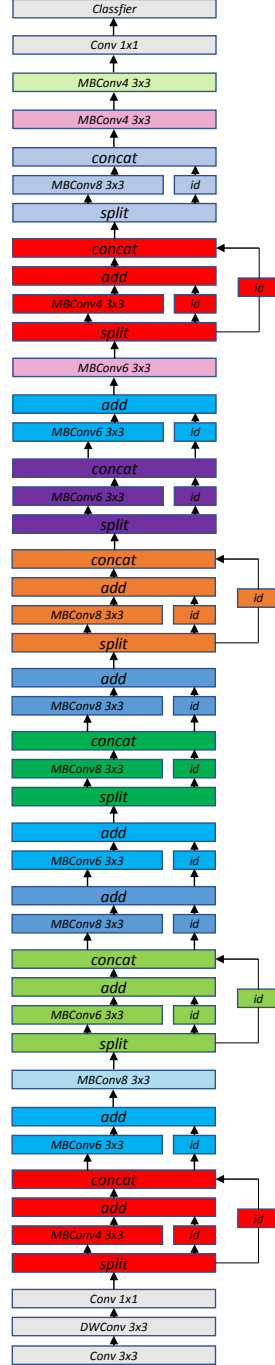

Figure 2. Structure of FPNASNet-A and FPNASNet. We obtain FPNASNet by adjusting FPNASNet-As channels to 300M FLOPs. Blocks in different colors possess various topological architectures.



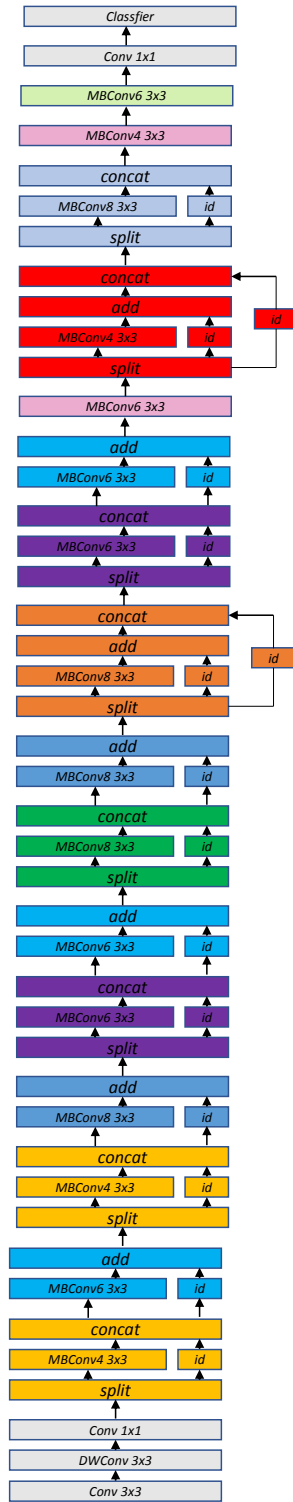

Figure 4. Structure of FPNASNet-C.
